# Supplementary material for: Gut Bacterial Dysbiosis in Children with Intractable Epilepsy
Source: PubMed Central journal article supplement (PMC7792797; doi:10.3390/jcm10010005), 2020-12-22
Supplement: jcm-10-00005-s001.pdf [file jcm-10-00005-s001.pdf]

# Supplementary Materials

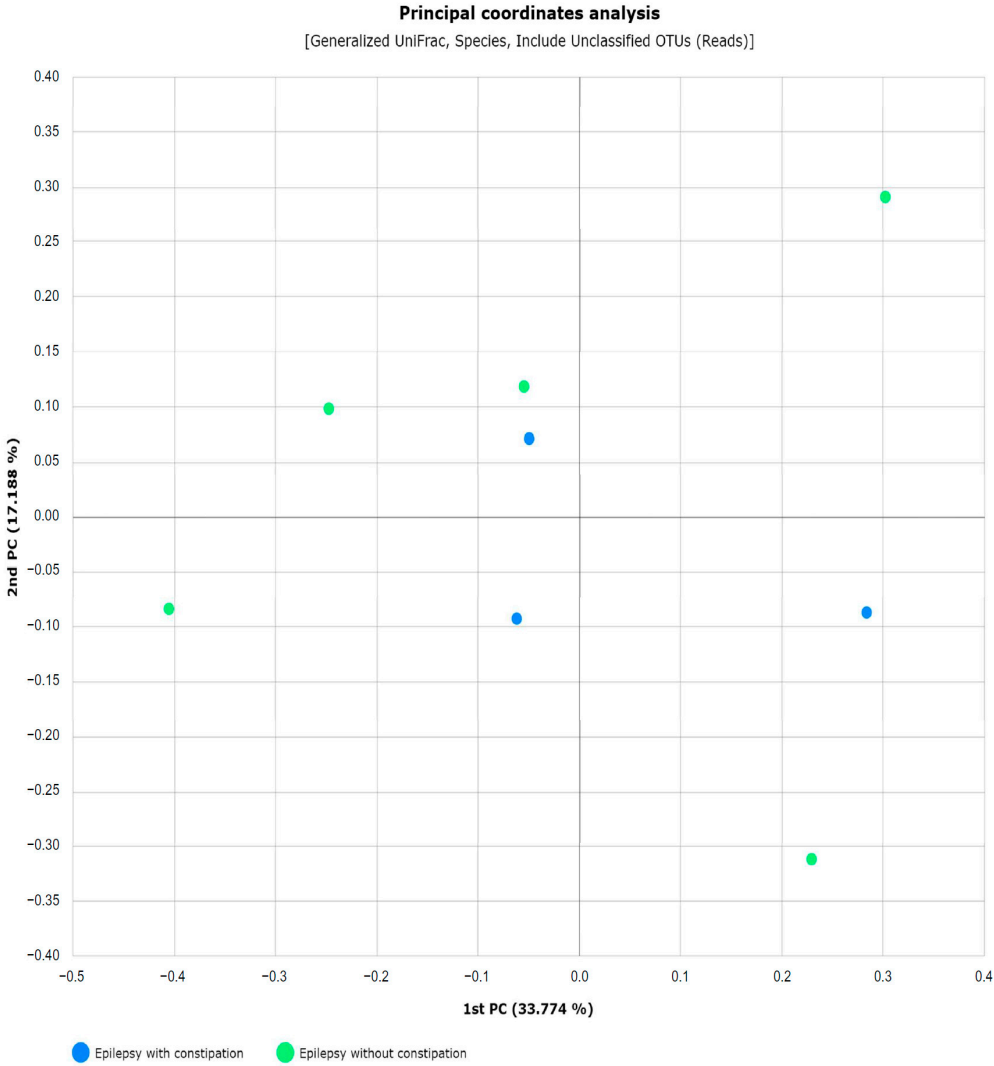

**Figure S1.** Comparison of gut bacterial taxonomic compositions of the patients with or without constipation. Principal coordinates were derived from the Unifrac distance among the subjects based on their species-level OTU compositions.

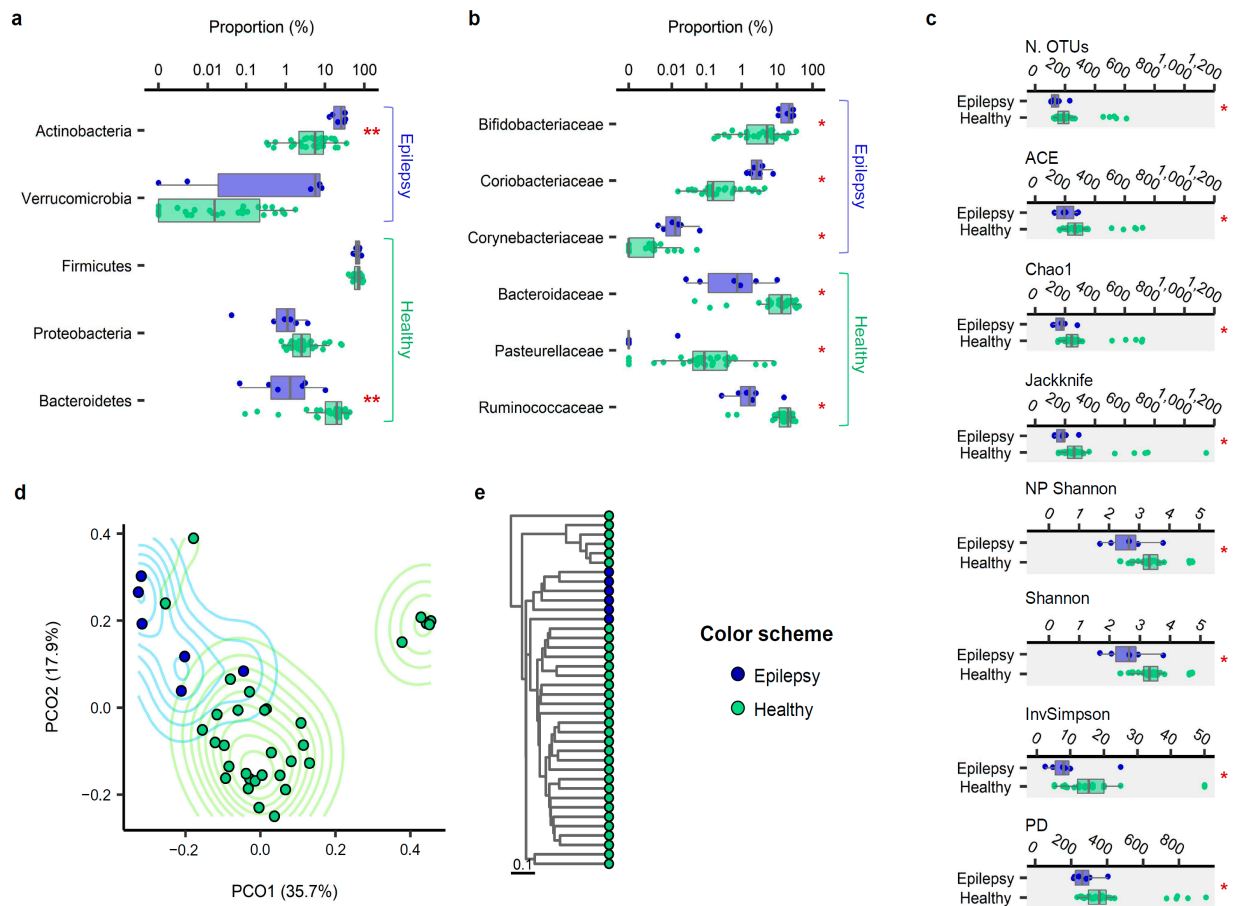

**Figure S2.** Community comparison repeated after excluding the subjects fed liquid diet. All the panels in the main Figure 1 were replicated here. **(a)** Phylum level compositions of gut microbiota compared between patients with intractable epilepsy and healthy controls, taxa displaying significant differences highlighted; **(b)** Comparison at family level; **(c)** Species richness and diversity index compared between patients with intractable epilepsy and healthy controls; **(d)** Principal coordinate analysis plot of the inter-subject variation of bacterial species-level OTU compositions based on UniFrac distance metric; **(e)** UPGMA dendrogram representing the species-level compositional distances among the subjects. \* labeled to the comparisons with FDR < 0.05, \*\* labeled to  $p < 0.01$ , based on Mann-Whitney test and Benjamini-Hochberg adjustment for multiple comparisons.

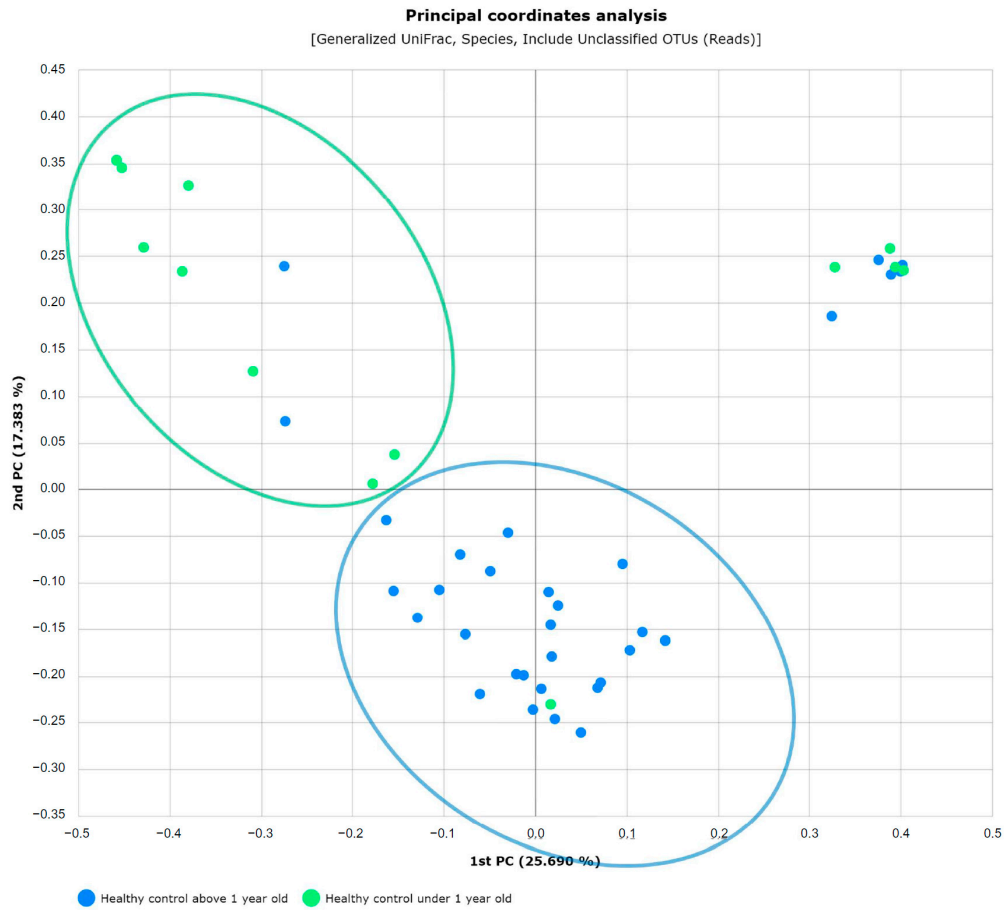

**Figure S3.** Gut bacterial community comparison between the subjects before and after 1 year of age. Principal coordinates were derived from the UniFrac distance among the species-level OTU composition of the subjects.

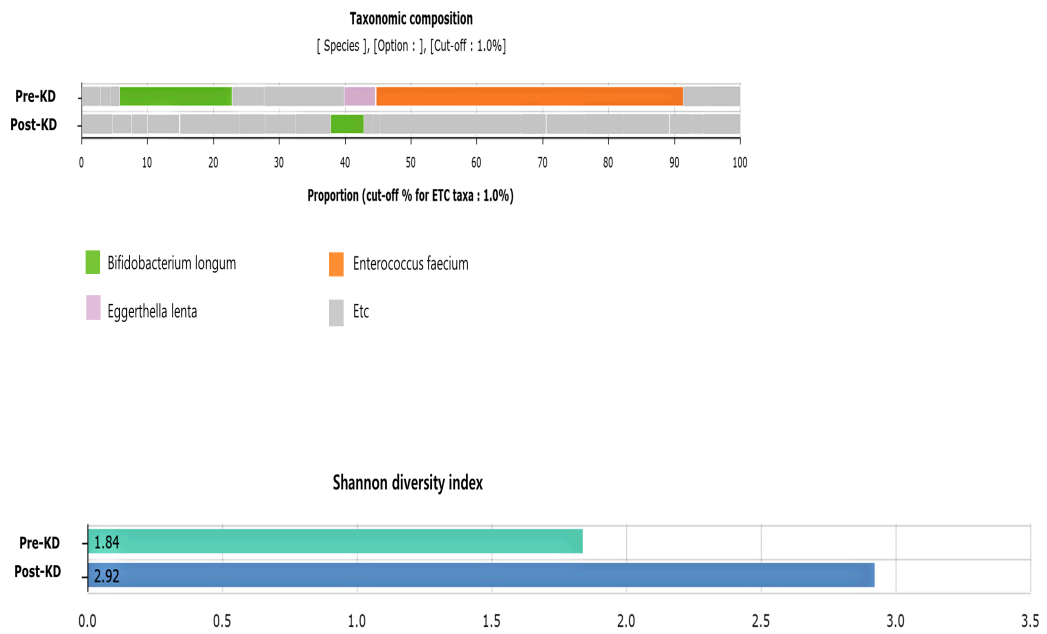

**Figure S4.** Changes in the gut microbiota after implementation of the ketogenic diet. A single patient was examined. In the taxonomic composition panel (upper) the epilepsy group-associated biomarkers discovered at species level were highlighted.

**Table 1.** Taxonomic differences depending on the presence of constipation in patients with epilepsy.

|                           | Epilepsy with<br>constipation | Epilepsy without<br>constipation | Total           | <i>p</i> |
|---------------------------|-------------------------------|----------------------------------|-----------------|----------|
|                           | ( <i>n</i> = 3)               | ( <i>n</i> = 5)                  | ( <i>n</i> = 8) |          |
| ACE                       | 147.7 ± 36.9                  | 184.9 ± 63.7                     | 171.0 ±<br>55.5 | 0.400    |
| Chao 1                    | 147.3 ± 32.4                  | 178.1 ± 64.1                     | 166.5 ±<br>53.8 | 0.476    |
| Jack knife                | 156.5 ± 34.2                  | 192.1 ± 66.3                     | 178.7 ±<br>56.5 | 0.430    |
| NP Shannon                | 2.4 ± 0.5                     | 2.3 ± 1.0                        | 2.4 ± 0.8       | 0.944    |
| Shannon                   | 2.4 ± 0.5                     | 2.3 ± 1.0                        | 2.3 ± 0.8       | 0.942    |
| Simpson                   | 0.2 ± 0.1                     | 0.2 ± 0.2                        | 0.2 ± 0.2       | 0.554    |
| Phylogenetic<br>Diversity | 252.7 ± 60.7                  | 288.4 ± 99.2                     | 275.0 ±<br>83.8 | 0.599    |

Abbreviations: ACE, abundance-based coverage estimator.
